# Health behaviours reported by adults with congenital heart disease across 15 countries

European Journal of Preventive Cardiology  
2020, Vol. 27(10) 1077–1087  
© The European Society of Cardiology 2019  
Article reuse guidelines:  
sagepub.com/journals-permissions  
DOI: 10.1177/2047487319876231  
journals.sagepub.com/home/cpr

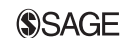

**Christina E Holbein<sup>1</sup>, James Peugh<sup>2</sup>, Gruschen R Veldtman<sup>3</sup>, Silke Apers<sup>4</sup>, Koen Luyckx<sup>5,6</sup>, Adrienne H Kovacs<sup>7,8</sup>, Corina Thomet<sup>9</sup>, Werner Budts<sup>10,11</sup>, Junko Enomoto<sup>12</sup>, Maayke A Sluman<sup>13,14</sup>, Chun-Wei Lu<sup>15</sup>, Jamie L Jackson<sup>16</sup>, Paul Khairy<sup>17</sup>, Stephen C Cook<sup>18</sup>, Shanthi Chidambarathanu<sup>19</sup>, Luis Alday<sup>20</sup>, Katrine Eriksen<sup>21</sup>, Mikael Dellborg<sup>22,23,24</sup>, Malin Berghammer<sup>22,25</sup>, Bengt Johansson<sup>26</sup>, Andrew S Mackie<sup>27</sup>, Samuel Menahem<sup>28</sup>, Maryanne Caruana<sup>29</sup>, Alexandra Soufi<sup>30</sup>, Susan M Fernandes<sup>31</sup>, Kamila White<sup>32,33</sup>, Edward Callus<sup>34,35</sup>, Shelby Kutty<sup>36,37</sup>, Philip Moons<sup>4,38,39</sup> and on behalf of the APPROACH-IS consortium and the International Society for Adult Congenital Heart Disease (ISACHD)**

<sup>1</sup>Department of Child and Adolescent Psychiatry and Behavioral Sciences, Children's Hospital of Philadelphia, USA

<sup>2</sup>Behavioral Medicine and Clinical Psychology, Cincinnati Children's Hospital Medical Center, USA

<sup>3</sup>Heart Centre, King Faisal Specialist Hospital and Research Centre, Saudi Arabia

<sup>4</sup>Department of Public Health and Primary Care, KU Leuven - University of Leuven, Belgium

<sup>5</sup>School Psychology and Development in Context, KU Leuven - University of Leuven, Belgium

<sup>6</sup>UNIBS, University of the Free State, South Africa

<sup>7</sup>Peter Munk Cardiac Center, University of Toronto, Canada

<sup>8</sup>Knight Cardiovascular Institute, Oregon Health and Science University, USA

<sup>9</sup>Center for Congenital Heart Disease, Inselspital - Bern University Hospital, Switzerland

<sup>10</sup>Division of Congenital and Structural Cardiology, University Hospitals Leuven, Belgium

<sup>11</sup>Department of Cardiovascular Sciences, KU Leuven - University of Leuven, Belgium

<sup>12</sup>Department of Adult Congenital Heart Disease, Chiba Cardiovascular Center, Japan

<sup>13</sup>Coronel Institute of Occupational Health, University of Amsterdam, the Netherlands

<sup>14</sup>Department of Cardiology, Jeroen Bosch Hospital, the Netherlands

<sup>15</sup>Adult Congenital Heart Center, National Taiwan University Children's Hospital

<sup>16</sup>Center for Biobehavioral Health, Nationwide Children's Hospital, USA

<sup>17</sup>Adult Congenital Heart Center, Université de Montréal, Canada

<sup>18</sup>Adult Congenital Heart Disease Center, Helen DeVos Children's Hospital, USA

<sup>19</sup>Pediatric Cardiology, Frontier Lifeline Hospital, India

<sup>20</sup>Division of Cardiology, Hospital de Niños, Argentina

<sup>21</sup>Adult Congenital Heart Disease Center, Oslo University Hospital - Rikshospitalet, Norway

<sup>22</sup>Centre for Person-Centred Care (GPCC), University of Gothenburg, Sweden

<sup>23</sup>Adult Congenital Heart Unit, Sahlgrenska University Hospital/Östra, Sweden

<sup>24</sup>Institute of Medicine, The Sahlgrenska Academy at University of Gothenburg, Sweden

<sup>25</sup>Department of Health Sciences, University West, Sweden

<sup>26</sup>Department of Public Health and Clinical Medicine, Umeå University, Sweden

<sup>27</sup>Division of Cardiology, Stollery Children's Hospital, Canada

<sup>28</sup>Monash Heart, Monash University, Australia

<sup>29</sup>Department of Cardiology, Mater Dei Hospital, Malta

<sup>30</sup>Department of Congenital Heart Disease, Louis Pradel Hospital, France

<sup>31</sup>Adult Congenital Heart Program at Stanford, Lucile Packard Children's Hospital and Stanford Health Care, USA

<sup>32</sup>Adult Congenital Heart Disease Center, Washington University, USA

<sup>33</sup>Barnes Jewish Heart and Vascular Center, University of Missouri, USA

<sup>34</sup>Clinical Psychology Service, IRCCS Policlinico San Donato, Italy

<sup>35</sup>Department of Biomedical Sciences for Health, Università degli Studi di Milano, Italy

<sup>36</sup>Adult Congenital Heart Disease Center, University of Nebraska Medical Center, USA

<sup>37</sup>Taussig Heart Center, Johns Hopkins School of Medicine, USA

<sup>38</sup>Institute of Health and Care Sciences, University of Gothenburg, Sweden

<sup>39</sup>Department of Paediatrics and Child Health, University of Cape Town, South Africa

## Corresponding author:

Philip Moons, KU Leuven, Department of Public Health and Primary Care, Kapucijnenvoer 35, Box 7001, B-3000 Leuven, Belgium.  
Email: philip.moons@kuleuven.be

## Abstract

**Background:** Health behaviours are essential to maintain optimal health and reduce the risk of cardiovascular complications in adults with congenital heart disease. This study aimed to describe health behaviours in adults with congenital heart disease in 15 countries and to identify patient characteristics associated with optimal health behaviours in the international sample.

**Design:** This was a cross-sectional observational study.

**Methods:** Adults with congenital heart disease ( $n=4028$ , median age = 32 years, interquartile range 25–42 years) completed self-report measures as part of the Assessment of Patterns of Patient-Reported Outcomes in Adults with Congenital Heart disease - International Study (APPROACH-IS). Participants reported on seven health behaviours using the Health Behaviors Scale-Congenital Heart Disease. Demographic and medical characteristics were assessed via medical chart review and self-report. Multivariate path analyses with inverse sampling weights were used to investigate study aims.

**Results:** Health behaviour rates for the full sample were 10% binge drinking, 12% cigarette smoking, 6% recreational drug use, 72% annual dental visit, 69% twice daily tooth brushing, 27% daily dental flossing and 43% sport participation. Pairwise comparisons indicated that rates differed between countries. Rates of substance use behaviours were higher in younger, male participants. Optimal dental health behaviours were more common among older, female participants with higher educational attainment while sports participation was more frequent among participants who were younger, male, married, employed/students, with higher educational attainment, less complex anatomical defects and better functional status.

**Conclusions:** Health behaviour rates vary by country. Predictors of health behaviours may reflect larger geographic trends. Our findings have implications for the development and implementation of programmes for the assessment and promotion of optimal health behaviours in adults with congenital heart disease.

## Keywords

Heart defects, congenital, patient-reported outcome measures, health behaviour, risk factors, prevention

Received 1 May 2019; accepted 25 August 2019

## Introduction

Optimal health behaviours (i.e. actions that individuals take to maintain or enhance their health and reduce health risks) are essential in the maintenance of good health and reduction of risk for cardiovascular complications (e.g. hypertension, stroke, infective endocarditis) in adults with congenital heart disease (CHD). Underscoring the importance of health behaviours, adults with CHD are at higher risk than the general population for cardiovascular events.<sup>1,2</sup> Both the 2018 American College of Cardiology (ACC)/American Heart Association (AHA) guidelines<sup>3</sup> and the 2010 European Society of Cardiology (ESC) guidelines<sup>4</sup> include general recommendations for health behaviours associated with better general and cardiovascular health. Adult CHD healthcare providers are encouraged to provide education to their patients about physical activity, oral hygiene behaviours (e.g. tooth brushing, flossing), dental follow-up and avoidance of unsafe substance use (e.g. heavy alcohol consumption, cigarette smoking, recreational drug use).<sup>5,6</sup>

Despite efforts to educate adults with CHD about the importance of various health behaviours, many adults have poor knowledge about the effects of a sedentary lifestyle, inadequate oral hygiene and substance

use on their cardiovascular health.<sup>7,8</sup> Although adults with CHD tend to report lower rates of risky substance use relative to healthy peers, alarming rates of binge drinking (26–44%), cigarette smoking (5–28%) and recreational drug use (11.4%) have been reported.<sup>8–14</sup> Furthermore, poor oral hygiene, lack of dental care, and low physical activity levels have been identified in this population.<sup>8,10,12,14–17</sup>

Data regarding health behaviour rates frequently obscure international and individual differences. Although geographic variations have been observed for health behaviours in the general population,<sup>18,19</sup> little is known about international differences in the adult CHD population. Potential causes of differences in health behaviours as a function of nationality include cultural beliefs and practices, access to preventative care and socioeconomic development factors.<sup>20–22</sup> Moreover, there is little knowledge regarding the patient-level characteristics related to health behaviours in adults with CHD. Individual demographic (e.g. age, sex, education level) and medical factors (e.g. heart defect complexity, functional status) have clear associations with behaviours that contribute to cardiovascular risk in both the general population<sup>20</sup> and among adults with CHD.<sup>7,11,14,21</sup> Both geographic context and individual patient characteristics may inform providers' efforts to

identify patients whose health behaviours may predispose them to increased cardiovascular risks. This knowledge may then be applied to targeted approaches to health behaviour screening and interventions.

The present study had three aims:

1. To describe health behaviours in a large international sample of adults with CHD.
2. To compare health behaviours in this sample across countries.
3. To identify patient characteristics associated with health behaviours.

## Methods

### Participants and procedures

Participants were enrolled as part of the Assessment of Patterns of Patient-Reported Outcomes in Adults with Congenital Heart disease - International Study (APPROACH-IS), which is a cross-sectional, observational study in 15 countries: Argentina, Australia, Belgium, Canada, France, India, Italy, Japan, Malta, Norway, Sweden, Switzerland, Taiwan, the Netherlands, and the USA. Data collection consisted of a battery of self-report questionnaires and occurred from April 2013–March 2015. The study protocol was approved by the Institutional Review Board of the University Hospitals Leuven/KU Leuven (i.e. the coordinating centre) and additional ethical approval and/or institutional review board approval was obtained by each participating centre as required. Participants provided written informed consent at most sites, although there were some countries in which national legislation does not require written consent for survey studies. Additional study procedures have been described in full elsewhere.<sup>23</sup> The study protocol was registered at ClinicalTrials.gov: NCT02150603.

To participate in APPROACH-IS, patients met the following eligibility criteria: (a) diagnosis of CHD; (b) 18 years of age or older; (c) diagnosis identified prior to adolescence; (d) continued follow-up at a CHD centre or participation in a national/regional registry; and (e) absence of physical, cognitive or language barriers to completing study measures. Patients were excluded from the study if they had undergone heart transplantation or had comorbid Group 1 pulmonary hypertension, except for pulmonary arterial hypertension related to CHD.

### Measures

In addition to medical chart review and completion of a demographic and medical history questionnaire, participants completed a battery of questionnaires,

including the Health Behaviors Scale-Congenital Heart Disease (HBS-CHD),<sup>24</sup> a self-report measure assessing three domains of health (see below). The HBS-CHD has been used in other CHD research and has demonstrated good-to-excellent content validity, adequate convergent validity and good-to-excellent ability to detect clinically meaningful changes.<sup>24</sup> The HBS-CHD was translated into other languages through a rigorous academic process (e.g. forward and backward translation, pilot testing with participants, revisions and proofreading).<sup>24</sup> With the exception of Dutch, psychometric data is not available for all language translations used in this study.

1. Substance use: to assess monthly binge-drinking, participants were asked to report how often they consumed six drinks or more on one occasion. One item assessed whether or not participants currently smoked cigarettes. Participants also reported use of other recreational substances, including cannabis, amphetamines ('speed'), 3,4-methylenedioxymethamphetamine (MDMA; 'ecstasy'), cocaine and psychedelic mushrooms; use of any of these drugs at least once per month was combined into one dichotomous variable indicating recreational drug use.
2. Dental health behaviours: participants reported whether they had visited the dentist within the past year and their average frequency of tooth brushing and flossing. Participants were considered to be following oral hygiene recommendations<sup>7</sup> if they had one annual dentist visit, brushed their teeth at least twice per day and flossed at least once per day.
3. Physical activity: participants reported whether they regularly practiced a sport (yes/no), excluding their daily commute via walking or cycling to school or work. Data regarding moderate and vigorous physical activity in this sample have been reported elsewhere.<sup>25</sup>

### Data analytic plan

The seven health behaviour response variables were measured as binary outcomes. Analyses were conducted using Mplus (version 7.3)<sup>26</sup> in three phases to address the study aims. All analyses, with the exception of health behaviour rate comparisons between countries (i.e. our second aim), used bootstrap resampling to obtain empirical rather than estimated standard errors, and the False Discovery Rate (FDR)<sup>27</sup> was used to control the Type-1 error rate. To control for the different sample sizes across countries, an inverse sampling weight was used for analyses addressing our second aim.<sup>28</sup> Missing data was minimal (0.1–9.1%) and handled via maximum likelihood estimation.

Sample characteristics are presented as median (interquartile range). A two-tailed  $p$ -value of  $<0.05$  indicated statistical significance.

Our first aim (i.e. describing specific health behaviour rates in adult CHD) was investigated using descriptive statistics. Analyses for our second aim used multivariate path analysis to compare the seven health behaviours across countries. Specifically, 14 nations were dummy-coded with the USA (i.e. the largest subsample) serving as the reference class. These 14 dummy variables served as predictors of the seven binary health behaviour response variables. A significant result indicated that the given health behaviour was reported more (or less) often versus the USA sample. Italy was not included in analyses comparing binge drinking across countries because  $<5\%$  Italian participants reported this behaviour. For our third aim (identification of significant predictors of health behaviours for the overall sample) analyses involved the use of multivariate path analysis; the seven health behaviour response variables were allowed to correlate, and were regressed onto five demographic variables (age, sex, marital status (married/cohabiting vs single/divorced/widowed), education and employment status (employed/student vs unemployed/retired)) and two medical variables (defect complexity, New York Heart Association (NYHA) class). Supplementary analysis of the associations between patient characteristics (i.e. demographic and medical variables) and the seven binary health behaviour response variables within each country was also conducted. Specifically, separate multivariate path analyses were performed for each country using multi-group analysis techniques.

## Results

### Participants

In total, 4028 participants (median age 32 (25–42) years, 53% women) were enrolled in APPROACH-IS. Approximately half of the sample had at least moderately complex CHD and 54% classified themselves as NYHA functional class I (i.e. no limitation of physical activity). See Supplementary Material Table 1 for additional participant demographics. Specific characteristics of the samples within each country have been provided in detail elsewhere.<sup>29</sup>

### Aim 1: health behaviours in adults with CHD

For the total sample, 10% of patients reported binge drinking, 12% reported cigarette smoking, and 6% reported at least monthly use of recreational drugs. Regarding oral hygiene, 72% of the patients had an annual dentist visit, 69% reported twice daily tooth

brushing, and 27% confirmed daily flossing. Sport participation was reported by 43% of participants.

### Aim 2: international comparisons for health behaviours

Percentages of each reported health behaviour for each country are shown in Figure 1. Health behaviour rates varied widely across countries, with multiple significant differences from the USA reference group for each behaviour (bold font in Figure 1). Statistics are available in Supplementary Material Table 2.

Patients from Australia and participating countries within Western and Northern Europe reported the highest rates of binge drinking and cigarette smoking while recreational drug use was highest in participating countries from North and South America. Patients from India and Taiwan reported the lowest rates of substance use behaviours. A more in-depth analysis of specific drugs (e.g. cannabis, MDMA, cocaine, psychedelic mushrooms, amphetamines) used in each country is reported in Figure 2. The highest rates for annual dental visits were observed in some Western and Northern European countries (81–87%), and the lowest rate in India (28%). Large disparities in daily tooth brushing and once daily flossing were observed within some countries (e.g. in France, 72% met tooth brushing criteria while 3% met flossing criteria; in India, 24% met tooth brushing criteria while 63% met flossing criteria). Regarding physical activity, patients in Asia (i.e. Taiwan, India and Japan) and the USA tended to report the lowest rates of sport participation while higher rates were observed in participating countries from Western and Northern Europe.

### Aim 3: predictors of health behaviours in adult CHD

Multivariate path analysis statistics for the entire sample are reported in Table 1.

**Substance use.** Significant predictors varied by health behaviour. Patients who reported at least monthly binge drinking were more likely to be younger, male, less educated, employed/students and have less complex defects. Cigarette smoking was more likely in patients who were younger, male, less educated and had less complex defects. Monthly drug use was associated with worse functional status, unemployment and being unmarried.

**Dental health.** For all three variables, better dental health care and hygiene were associated with being older, female and having higher educational attainment. Patients with a better functional status were also more likely to brush their teeth and follow up

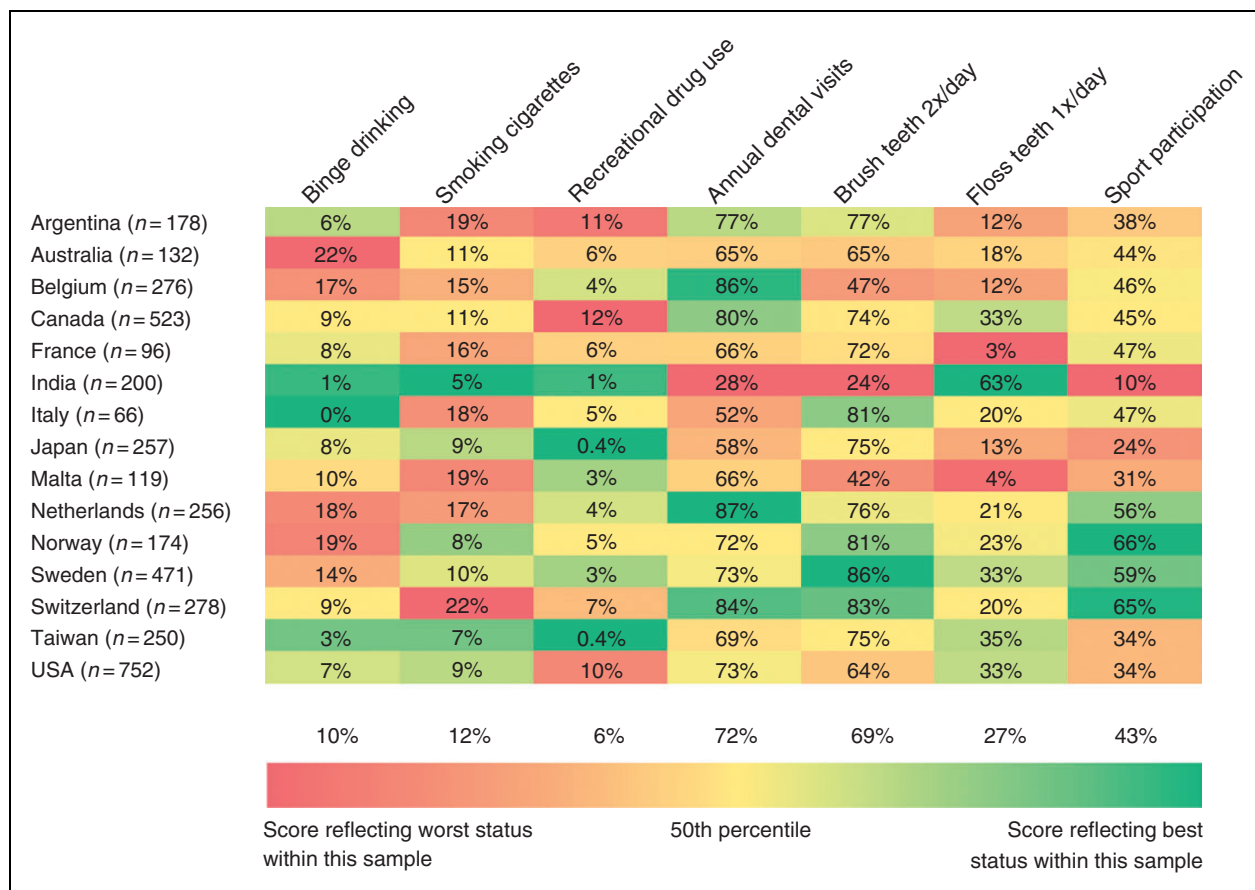

**Figure 1.** Descriptive statistics and pairwise comparisons of health behaviour rates for the entire sample and by country. Bold values indicate those that are significantly different than the reference country (USA) at  $p < 0.05$ .

yearly with a dentist, while employment was associated only with annual dental follow-up.

**Physical activity.** Patients who were younger, male, married/cohabiting, employed/students, with greater educational attainment, less complex defects and better functional status reported a higher likelihood of participating in sports.

**Supplementary within-country analysis.** In general, the relationship between specific patient characteristics and each health behaviour differed within each country. Complete statistics are provided in Supplementary Material Table 3.

### Discussion

This large, international investigation examined the breadth and depth of health behaviours (substance use, dental care, physical activity) in adults with CHD. Results provide insight into geographic trends in the rates of health behaviours and identify predictors of health behaviours at the international level. These

findings have implications for the development and implementation of programmes, including structured transition services for the transfer from paediatric to adult CHD care, that target assessment and promotion of optimal health behaviours in adults with CHD. Increasing the likelihood that adults with CHD will abstain from unhealthy substance use, engage in annual dental care and good oral hygiene, and participate in physical activity pursuits is essential for maintaining optimal cardiovascular outcomes and preventing complications in this population.

Results demonstrated wide variability in the rates of each health behaviour across participating countries. Reasons for these differences are likely multifactorial (e.g. healthcare organization, national economic development, cultural values and beliefs, laws and regulations pertaining to availability of some substances, geographic barriers).<sup>20,22</sup> In line with conclusions by Caruana and Grech,<sup>14</sup> health behaviours of adults with CHD may largely follow demographic trends of the general population, with the presence of CHD having only a subtle impact. To maximise the likelihood of positive cardiovascular outcomes, all CHD

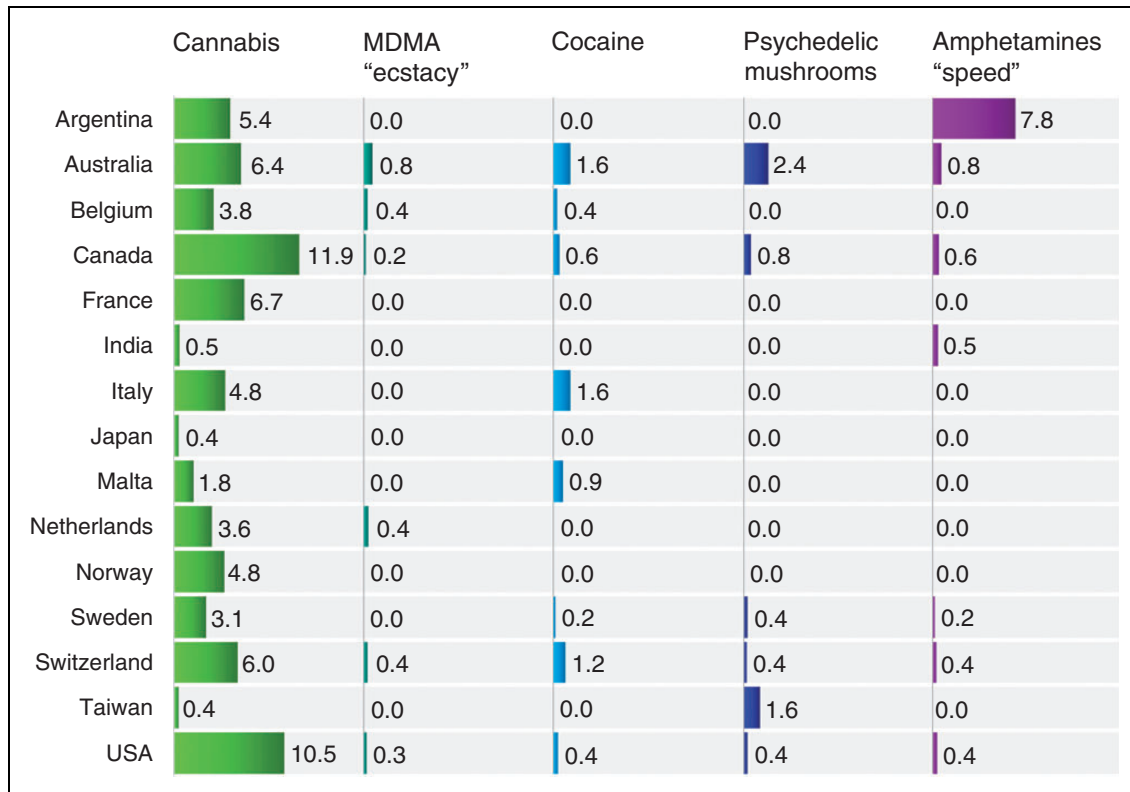

**Figure 2.** Usage rates (%) of specific types of recreational drugs by country.

providers, regardless of geographic location, are encouraged to screen for health behaviours and provide appropriate intervention. However, within countries, it is important to identify health behaviours that may be of particular concern to identify patients most at risk for adverse cardiovascular complications. For example, countries with lower rates of annual dental follow-up care may develop and implement a screening tool, provide targeted education about the importance of regular dental care and hygiene, and address logistical barriers (e.g. identifying local dentists, helping patients to navigate payment options).

Our findings revealed several patterns in the associations between patient characteristics and health behaviours. Consistent with previous research in both CHD and general population samples,<sup>9,11,14,30</sup> patients who were younger and male were more likely to engage in all three substance-use behaviours. These results are concerning given the established short- and long-term negative cardiovascular outcomes associated with binge drinking, cigarette smoking and recreational drug use during young adulthood.<sup>31–33</sup> Further, adults with less education and less complex heart defects were also more likely to report binge drinking and cigarette use. Overall, younger male adults with CHD may be a target group for focusing efforts to assess substance use, provide education about the long-term effects of

each type of substance use and provide tailored recommendations (e.g. referral to a smoking cessation programme, involvement of behavioural health providers).

Rates of dental follow-up and oral hygiene (i.e. tooth brushing, flossing) tended to be highest in patients who were older, female, better educated or had a lower NYHA class. Indeed, prior research with healthy adults has also found that education level and female sex are positively associated with better oral hygiene behaviours,<sup>34</sup> although sex and age were unrelated to dental follow-up in a sample of Maltese adults with CHD.<sup>14</sup> However, it is concerning that patients with poorer functional status were less likely to follow guidelines for annual dental follow-up and tooth brushing. These patients are at greater risk for cardiovascular complications, including endocarditis.<sup>35</sup> Given that dental problems are a primary cause of infective endocarditis,<sup>36</sup> efforts to improve access and education regarding annual dentist visits and oral hygiene behaviours may be especially important for patients with poorer functional status.

Patients most likely to engage in sports tended to be younger, male, married or cohabiting with a partner, better educated, employed or in school, and have simpler defects and better functional status. These findings are largely consistent with previous research examining physical activity rates in adults with CHD.<sup>9,11,16,17,25,37</sup>

**Table 1.** Multivariate path analysis results demonstrating associations between patient characteristics and health behaviours for the entire sample.

| Predictor          | Binge drinking      |                  |                | Cigarette smoking |                  |                | Recreational drug use |                  |                | Annual dentist visit |                  |                |
|--------------------|---------------------|------------------|----------------|-------------------|------------------|----------------|-----------------------|------------------|----------------|----------------------|------------------|----------------|
|                    | OR                  | 95% CI           | p              | OR                | 95% CI           | p              | OR                    | 95% CI           | p              | OR                   | 95% CI           | p              |
| Age                | <b>0.99</b>         | <b>0.98–1.00</b> | <b>0.001</b>   | <b>0.99</b>       | <b>0.98–1.00</b> | <b>0.022</b>   | <b>0.96</b>           | <b>0.94–0.98</b> | < <b>0.001</b> | <b>1.02</b>          | <b>1.01–1.03</b> | < <b>0.001</b> |
| Defect complexity  | <b>0.72</b>         | <b>0.62–0.85</b> | < <b>0.001</b> | <b>0.71</b>       | <b>0.62–0.81</b> | < <b>0.001</b> | 0.98                  | 0.81–1.18        | 0.829          | 1.08                 | 0.97–1.21        | 0.152          |
| Sex (female)       | <b>0.23</b>         | <b>0.18–0.28</b> | < <b>0.001</b> | <b>0.72</b>       | <b>0.59–0.89</b> | <b>0.002</b>   | <b>0.42</b>           | <b>0.31–0.57</b> | < <b>0.001</b> | <b>1.46</b>          | <b>1.25–1.70</b> | < <b>0.001</b> |
| Married/cohabiting | <b>0.80</b>         | <b>0.65–0.99</b> | <b>0.042</b>   | 0.95              | 0.76–1.18        | 0.639          | 0.79                  | 0.57–1.10        | 0.165          | 1.10                 | 0.93–1.29        | 0.259          |
| Education          | <b>0.87</b>         | <b>0.77–0.99</b> | <b>0.032</b>   | <b>0.74</b>       | <b>0.66–0.82</b> | < <b>0.001</b> | 0.94                  | 0.81–1.08        | 0.372          | <b>1.14</b>          | <b>1.06–1.23</b> | <b>0.001</b>   |
| Employed/student   | <b>1.62</b>         | <b>1.15–2.27</b> | <b>0.006</b>   | 0.96              | 0.74–1.24        | 0.758          | 0.94                  | 0.64–1.36        | 0.729          | <b>1.51</b>          | <b>1.26–1.81</b> | < <b>0.001</b> |
| NYHA class         | 0.85                | 0.72–1.01        | 0.058          | 1.01              | 0.89–1.16        | 0.839          | 1.14                  | 0.95–1.37        | 0.165          | <b>0.81</b>          | <b>0.73–0.90</b> | < <b>0.001</b> |
|                    | Sport participation |                  |                |                   |                  |                |                       |                  |                |                      |                  |                |
|                    | Brush teeth 2×/day  |                  |                |                   |                  |                |                       |                  |                |                      |                  |                |
|                    | OR                  | 95% CI           | p              | OR                | 95% CI           | p              | OR                    | 95% CI           | p              | OR                   | 95% CI           | p              |
| Age                | <b>1.01</b>         | <b>1.01–1.02</b> | < <b>0.001</b> | <b>1.03</b>       | <b>1.02–1.04</b> | < <b>0.001</b> | <b>0.99</b>           | <b>0.98–1.00</b> | <b>0.007</b>   |                      |                  |                |
| Defect complexity  | 1.05                | 0.94–1.16        | 0.398          | 1.11              | 0.98–1.25        | 0.091          | <b>0.88</b>           | <b>0.79–0.99</b> | <b>0.029</b>   |                      |                  |                |
| Sex (female)       | <b>1.99</b>         | <b>1.72–2.29</b> | < <b>0.001</b> | <b>1.62</b>       | <b>1.39–1.88</b> | < <b>0.001</b> | <b>0.77</b>           | <b>0.68–0.88</b> | < <b>0.001</b> |                      |                  |                |
| Married/cohabiting | 1.01                | 0.84–1.21        | 0.951          | 0.86              | 0.70–1.05        | 0.127          | <b>1.23</b>           | <b>1.07–1.40</b> | <b>0.003</b>   |                      |                  |                |
| Education          | <b>1.27</b>         | <b>1.17–1.38</b> | < <b>0.001</b> | <b>1.30</b>       | <b>1.19–1.42</b> | < <b>0.001</b> | <b>1.25</b>           | <b>1.17–1.34</b> | < <b>0.001</b> |                      |                  |                |
| Employed/student   | 1.23                | 0.98–1.55        | 0.074          | 0.91              | 0.70–1.18        | 0.474          | <b>1.46</b>           | <b>1.21–1.77</b> | < <b>0.001</b> |                      |                  |                |
| NYHA class         | <b>0.83</b>         | <b>0.75–0.91</b> | < <b>0.001</b> | 1.01              | 0.91–1.12        | 0.848          | <b>0.62</b>           | <b>0.56–0.69</b> | < <b>0.001</b> |                      |                  |                |

CI: confidence interval; NYHA: New York Heart Association; OR: odds ratio. Defect complexity was coded using a three-point scale (i.e. 1 = simple, 2 = moderate, 3 = complex). Education was coded using a four-point scale (e.g. 1 = Less than high school; 4 = University degree). Bold font indicates significance at  $p < 0.05$ .

Of note, while physicians historically tended to restrict physical activity for patients with more complex CHD, there has been increasing awareness about the benefits of appropriate exercise and cardiac rehabilitation programmes for patients with severe defects (e.g. single ventricle physiology, tricuspid atresia).<sup>38</sup> In general, CHD providers are encouraged to provide education about physical activity (e.g. why it is important for long-term cardiovascular health, patient-specific limitations) and engage patients in promoting physical activity. Based on our results, extra attention on this topic may be needed for patients who are older or female and those with more complex CHD and poorer functional status.

Taken together, our results suggest that efforts to maximise optimal health behaviours require global evidence-based educational and behavioural approaches adapted to each region's specific characteristics and needs. CHD providers may aim to improve their identification of patients in need of support for changing health behaviours. Referral to behavioural health specialists (e.g. psychologists, clinical social workers, counsellors) who have expertise in evidence-based interventions for promoting health behaviour changes should also be considered. Other multidisciplinary professionals, including physical therapists and dietitians, may also be instrumental in promoting optimal health behaviours. Structured programmes designed to facilitate the transition from paediatric to adult CHD services may provide unique and valuable opportunities to educate adolescent and young adult patients about optimal health behaviours and assist them in maintaining healthy lifestyles.<sup>6,8</sup>

In addition to patient characteristics, it is also critical for CHD providers to consider the unique geographic, cultural, economic and socio-political factors that may affect their patients' ability or willingness to engage in optimal health behaviours.<sup>22</sup> Patients may face varying obstacles (e.g. availability, ease of travel, cost of services, social stigma) in accessing appropriate dental care, substance abuse services and physical activity programmes. Furthermore, health literacy should be considered since this has been found to be associated with health behaviours.<sup>39</sup> Further research is needed within each country to determine other country-level factors that may need to be considered, when developing screening and intervention methods to increase optimal health behaviours.

Despite the relative strengths of this study (e.g. large international sample, rigorous analytic plan, type I error control), the results of this study must be considered with respect to several limitations. First, health behaviours were assessed via self-report, which may introduce recall and social desirability biases and provide overly positive estimates of health

behaviours.<sup>37</sup> Future studies may benefit from incorporating multiple reporters (e.g. significant others), more objective measures (e.g. pedometers, dental follow-up records, toxicology testing) and ecological momentary assessment methods. Second, data were cross-sectional, thereby precluding the ability to identify causal associations, and were limited to the years 2013–2015; longitudinal research will serve an important role in determining the direction of the effects and tracking changes in health behaviour rates over time. Future studies may also establish associations between health behaviours and clinically meaningful CHD outcomes (e.g. hospital admissions, cardiovascular indices, quality of life). Third, the binary health behaviour outcomes utilised in the study do not allow for more nuanced insights regarding each health behaviour. Additional studies are needed to fully examine each health behaviour (e.g. for adults who endorse cigarette smoking, additional investigation into the frequency, amount, age at first cigarette, attempts to quit, etc.). Similarly, although internationally recognised operationalizations of health behaviours for decreasing cardiovascular risk were used, we acknowledge that definitions, language translations and applications may vary depending on geographic region. For example, in contrast to the definition of binge drinking used in this study, binge drinking is defined in the USA as at least four drinks for women or five drinks for men consumed within approximately two hours.<sup>40</sup> Also, when translated into some Indian languages, the term for dental flossing may also apply to traditional or indigenous dental hygiene methods that may differ from current Western flossing practices. Fourth, we acknowledge that this study did not investigate all health behaviours considered vital to optimal cardiovascular health. Additional health behaviours to study in the future include dietary choices, tattoo safety, prophylactic antibiotic use, vaccinations and stress management practices. Other patient characteristics, such as anxiety, depressive symptoms and health beliefs, are also important to examine as potential predictors. Fifth, it is acknowledged that there was variability in the number of participating sites per country (e.g. India – one site, USA – six sites) that did not reflect each country's population size. Certainly, within-country variability must be considered when interpreting these results and designing future studies.

In conclusion, although many adults with CHD maintain healthy lifestyles, there remains a sizable portion of the population engaging in recreational substance use, lacking adequate dental care and oral hygiene, and not participating in sports. Patients are more likely to engage in particular health behaviours depending on the country in which they live. This investigation may encourage CHD providers to adapt



screening, promotion and intervention efforts aimed at improving optimal health behaviours to the specific needs of the countries in which they practise as well as to the patient characteristics that are uniquely related to health behaviours within each country.

### Author contribution

The following author contributions were made: contributed to conception and design of the study: CH, GV, SA, KL, AK, PM; contributed to acquisition, analysis, or interpretation of data: CH, JP, GV, SA, CT, WB, JE, MS, CWL, JLJ, PK, SCo, SCh, LA, KE, MD, MB, BJ, AM, SM, MC, AS, SF, KW, EC, SK, PM; drafted the manuscript: CH, JP, PM; critically revised the manuscript: CH, JP, GV, SA, KL, AK, CT, WB, JE, MS, CWL, JLJ, PK, SCo, SCh, LA, KE, MD, MB, BJ, AM, SM, MC, AS, SF, KW, EC, SK, PM; gave final approval: CH, JP, GV, SA, KL, AK, CT, WB, JE, MS, CWL, JLJ, PK, SCo, SCh, LA, KE, MD, MB, BJ, AM, SM, MC, AS, SF, KW, EC, SK, PM.

### Acknowledgements

The APPROACH-IS consortium comprises the following collaborators: Luis Alday, Héctor Maisuls, Betina Vega (Córdoba, Argentina, Hospital de Niños); Samuel Menahem, Sarah Eaton, Qi F Wang, Ruth Larion (Melbourne, Australia, Monash Medical Center); Werner Budts, Kristien Van Deyk (Leuven, Belgium, University Hospitals of Leuven); Silke Apers, Eva Goossens, Jessica Rassart, Koen Luyckx, Philip Moons (Leuven, Belgium, University of Leuven); Gwen Rempel, Andrew Mackie, Ross Ballantyne, Kathryn Rankin, Colleen Norris, Dylan Taylor, Isabelle Vondermuhll, Jonathan Windram, Pamela Heggie, Gerri Lasiuk (Edmonton, Canada, University of Alberta); Paul Khairy, Anna Proietti, Annie Dore, Lise-Andrée Mercier, François-Pierre Mongeon, François Marcotte, Reda Ibrahim, Blandine Mondésert, Marie-Claude Côté (Montreal, Canada, Montreal Heart Institute); Adrienne Kovacs, Erwin Oechslin, Mimi Bandyopadhyay (Toronto, Canada, University Health Network); Alexandra Soufi, Sylvie Di Filippo, François Sassolas, André Bozio, Cécile Chareyras (Lyon, France, Louis Pradel Hospital); Shanthi Chidambarathanu, Farida Farzana, Nitya Lakshmi (Chennai, India, Frontier Lifeline Hospital, Dr KM Cherian Heart Foundation); Edward Callus, Emilia Quadri, Massimo Chessa, Giovanna Campioni, Alessandro Giamberti (Milan, Italy, IRCCS Policlinico San Donato Hospital); Junko Enomoto, Yoshiko Mizuno (Chiba, Japan, Chiba Cardiovascular Center); Maryanne Caruana, Victor Grech, Sheena Vella, Anabel Mifsud, Neville Borg, Daniel Chircop, Matthew M Balbi, Rachel V Critien, James Farrugia, Yanika Gatt, Darlene Muscat (Msida, Malta, Mater Dei Hospital); Katrine Eriksen, Mette-Elise Estensen (Oslo, Norway, Oslo University Hospital); Mikael Dellborg, Malin Berghammer (Gothenburg, Sweden, Sahlgrenska University Hospital); Eva Mattsson, Anita Strandberg, Pia Karlström-Hallberg (Stockholm, Sweden, Karolinska University Hospital); Bengt Johansson, Anna-Karin Kronhamn (Umeå, Sweden, Umeå University Hospital); Markus Schwerzman, Corina Thomet, Margrit Huber

(Bern, Switzerland, University Hospital Bern); Jou-Kou Wang, Chun-Wei Lu, Hsiao-Ling Yang, Yu C Hua (Taipei, Taiwan, National Taiwan University Hospital); Barbara Mulder, Maayke Sluman (Amsterdam, the Netherlands, Amsterdam Medical Center); Marco Post (Nieuwegein, the Netherlands, St Antonius Hospital); Els Pieper (Groningen, the Netherlands, University Medical Center Groningen); Kathinka Peels (Eindhoven, the Netherlands, Catharina Hospital); Marc Waskowsky (Zwolle, the Netherlands, Isala Clinic); Gruschen Veldtman, Michelle Faust, Colin Lozier, Christy Reed, Jamie Hilfer (Cincinnati, USA, Cincinnati Children's Hospital Medical Center); Curt Daniels, Jamie Jackson (Columbus, USA, Nationwide Children's Hospital); Shelby Kutty, Carolyn Chamberlain, Sara Warta (Omaha, USA, Children's Hospital and Medical Center); Stephen Cook, Morgan Hinds (Pittsburgh, USA, Children's Hospital of Pittsburgh of UPMC); Ari Cedars, Kamila White (Saint Louis, USA, Washington University and Barnes Jewish Heart and Vascular Center, University of Missouri); Susan Fernandes, Anitra Romfh, Kirstie MacMillen (Palo Alto, USA, Stanford University).

### Declaration of conflicting interests

The author(s) declared no potential conflicts of interest with respect to the research, authorship and/or publication of this article.

### Funding

The author(s) disclosed receipt of the following financial support for the research, authorship and/or publication of this article: The Research Fund – KU Leuven (OT/11/033), the Swedish Heart-Lung Foundation (20130607), the University of Gothenburg Centre for Person-centred Care, Cardiac Children's Foundation Taiwan (CCF2013\_02), and the National Institutes of Health (T32HD068223).

### References

1. Lanz J, Brophy JM, Therrien J, et al. Stroke in adults with congenital heart disease: Incidence, cumulative risk, and predictors. *Circulation* 2015; 132: 2385–2394.
2. Billett J, Cowie MR, Gatzoulis MA, et al. Comorbidity, healthcare utilisation and process of care measures in patients with congenital heart disease in the UK: Cross-sectional, population-based study with case-control analysis. *Heart* 2008; 94: 1194–1199.
3. Stout KK, Daniels CJ, Aboulhosn JA, et al. 2018 AHA/ACC guideline for the management of adults with congenital heart disease: A report of the American College of Cardiology/American Heart Association Task Force on Clinical Practice Guidelines. *J Am Coll Cardiol* 2019; 73: e81–e192.
4. Baumgartner H, Bonhoeffer P, De Groot NM, et al. ESC Guidelines for the management of grown-up congenital heart disease (new version 2010): The Task Force on the Management of Grown-up Congenital Heart Disease of the European Society of Cardiology (ESC). *Eur Heart J* 2010; 31: 2915–2957.

5. Rosenthal TM, Leung ST, Ahmad R, et al. Lifestyle modification for the prevention of morbidity and mortality in adult congenital heart disease. *Congenit Heart Dis* 2016; 11: 189–198.
6. Sillman C, Morin J, Thomet C, et al. Adult congenital heart disease nurse coordination: Essential skills and role in optimizing team-based care. A position statement from the International Society for Adult Congenital Heart Disease (ISACHD). *Int J Cardiol* 2017; 229: 125–131.
7. Jackson JL, Tierney K, Daniels CJ, et al. Disease knowledge, perceived risk and health behavior engagement among adolescents and adults with congenital heart disease. *Heart Lung* 2015; 44: 39–44.
8. Janssens A, Goossens E, Luyckx, et al. Exploring the relationship between disease-related knowledge and health risk behaviours in young people with congenital heart disease. *Eur J Cardiovasc Nurs* 2016; 15: 231–240.
9. Moons P, Van Deyk K, Dedroog D, et al. Prevalence of cardiovascular risk factors in adults with congenital heart disease. *Eur J Cardiovasc Prev Rehab* 2006; 13: 612–616.
10. Reid GJ, Webb GD, McCrindle BW, et al. Health behaviors among adolescents and young adults with congenital heart disease. *Congenit Heart Dis* 2008; 3: 16–25.
11. Zomer AC, Vaartjes I, Uiterwaal CS, et al. Social burden and lifestyle in adults with congenital heart disease. *Am J Cardiol* 2012; 109: 1657–1663.
12. Overgaard D, Schrader AM, Lisby KH, et al. Substance use, dental hygiene, and physical activity in adult patients with single ventricle physiology. *Congenit Heart Dis* 2014; 9: 75–82.
13. Khan M, Monaghan M, Klein N, et al. Associations among depressive symptoms with alcohol and smoking tobacco use in adult patients with congenital heart disease. *Congenit Heart Dis* 2015; 10: e243–e249.
14. Caruana M and Grech V. Lifestyle habits among adult congenital heart disease patients in Malta. *Congenit Heart Dis* 2016; 11: 332–340.
15. Drayton AL, O’Sullivan JJ and Walton G. Dental surveillance in the adult congenital heart disease population. *Heart* 2013; 99: 1624.
16. Opić P, Utens EM, Cuypers JA, et al. Sports participation in adults with congenital heart disease. *Int J Cardiol* 2015; 187: 175–182.
17. Sandberg C, Pomeroy J, Thilén U, et al. Habitual physical activity in adults with congenital heart disease compared with age- and sex-matched controls. *Can J Cardiol* 2016; 32: 547–553.
18. Guthold R, Ono T, Strong KL, et al. Worldwide variability in physical inactivity: A 51-country survey. *Am J Prev Med* 2008; 34: 486–494.
19. Ng M, Freeman MK, Fleming TD, et al. Smoking prevalence and cigarette consumption in 187 countries, 1980–2012. *JAMA* 2014; 311: 183–192.
20. Havranek EP, Mujahid MS, Barr DA, et al. Social determinants of risk and outcomes for cardiovascular disease: A scientific statement from the American Heart Association. *Circulation* 2015; 132: 873–898.
21. Moons P, Kovacs AH, Luyckx K, et al. Patient-reported outcomes in adults with congenital heart disease: Inter-country variation, standard of living and healthcare system factors. *Int J Cardiol* 2018; 251: 34–41.
22. Van Bulck L, Luyckx K, Goossens E, et al. Patient-reported outcomes of adults with congenital heart disease from eight European countries: Scrutinising the association with healthcare system performance. *Eur J Cardiovasc Nurs* 2019; 18: 465–473.
23. Apers S, Kovacs AH, Luyckx K, et al. Assessment of Patterns of Patient-Reported Outcomes in Adults with Congenital Heart disease – International Study (APPROACH-IS): Rationale, design, and methods. *Int J Cardiol* 2015; 179: 334–342.
24. Goossens E, Luyckx K, Mommen N, et al. Health risk behaviors in adolescents and emerging adults with congenital heart disease: Psychometric properties of the Health Behavior Scale-Congenital Heart Disease. *Eur J Cardiovasc Nurs* 2013; 12: 544–557.
25. Larsson L, Johansson B, Sandberg C, et al. Geographical variation and predictors of physical activity levels in adults with congenital heart disease. *Int J Cardiol Heart Vasc* 2019; 22: 20–25.
26. Muthén L and Muthén B. *Mplus User’s guide 7.0*. Los Angeles: Muthén and Muthén, 1998–2015.
27. Benjamini Y and Hochberg Y. Controlling the false discovery rate: A practical and powerful approach to multiple testing. *J R Stat Soc Series B Stat Methodol* 1995; 57: 289–300.
28. Stapleton LM. An assessment of practical solutions for structural equation modeling with complex sample data. *Struct Equ Model* 2006; 13: 28–58.
29. Apers S, Kovacs AH, Luyckx K, et al. Quality of life in adults with congenital heart disease in 15 countries: Evaluation country-specific characteristics. *J Am Coll Cardiol* 2016; 67: 2237–2245.
30. Wilsnack RW, Wilsnack SC, Gmel G, et al. Gender differences in binge drinking: Prevalence, predictors, and consequences. *Alcohol Res* 2018; 39: 57–76.
31. Piano MR, Mazzucco A, Kang M, et al. Cardiovascular consequences of binge drinking: An integrative review with implications for advocacy, policy, and research. *Alcohol Clin Exp Res* 2017; 41: 487–496.
32. Gooding HC, Shay CM, Ning H, et al. Optimal lifestyle components in young adulthood are associated with maintaining the ideal cardiovascular health profile into middle age. *J Am Heart Assoc* 2015; 4: e002048.
33. Degenhardt L and Hall W. Extent of illicit drug use and dependence, and their contribution to the global burden of disease. *Lancet* 2012; 379: 55–70.
34. Aflalo E, Dichtiar R, Zusman SP, et al. The association between health attitudes and behaviors and oral-health-related practices. *Quintessence Int* 2018; 49: 153–162.
35. Kogon B, Grudziak J, Sahu A, et al. Surgery in adults with congenital heart disease: Risk factors for morbidity and mortality. *Ann Thorac Surg* 2013; 95: 1377–1382.
36. Di Filippo S, Delahaye F, Semiond B, et al. Current patterns of infective endocarditis in congenital heart disease. *Heart* 2006; 92: 1490–1495.

37. Larsson L, Johansson B, Wadell K, et al. Adults with congenital heart disease overestimate their physical activity. *Int J Cardiol Heart Vasc* 2018; 22: 13–17.
38. Festa P and Ali LA. Should we prescribe physical activity in Fontan as conventional therapy? *Int J Cardiol* 2018; 255: 59–60.
39. Aaby A, Friis K, Christensen B, et al. Health literacy is associated with health behaviour and self-reported health: A large population-based study in individuals with cardiovascular disease. *Eur J Prev Cardiol* 2017; 24: 1880–1888.
40. Centers for Disease Control and Prevention (CDC). Vital signs: Binge drinking prevalence, frequency, and intensity among adults – United States, 2010. *MMWR Morb Mortal Wkly Rep* 2012; 61: 14–19.
